# Supplementary material for: Effects of vitamin D and exercise on glycemic control and circulating 25(OH)D in adults with metabolic disorders: A systematic review and meta-analysis with GRADE assessment
Source: Research Square preprint supplement (doi:10.21203/rs.3.rs-8122833/v1), 2025-12-17
Supplement: Supplementary file 1 [file 7b11299c1f052283a2985d16.docx]

| **Supplementary Table 1.** Search strategy to find potential eligible randomised controlled trials (2025 August,11) | |
| --- | --- |
| **Groups** | **Descriptors** |
| Intervention 1 | "Vitamin D" OR "Vitamin D3" OR ergocalciferol OR Cholecalciferol OR calciferol OR "1,25-dihydroxyvitamin D" OR calciol OR "25-hydroxyvitamin D" OR Calcidiol OR calcitriol OR "25(OH)D" OR "1,25(OH)2D" OR "Serum vitamin D" OR "Vitamin D level" OR "Vitamin D status" OR "D3 vitamin" OR "Vitamin D supplementation" OR "Vitamin D deficiency" OR “Vitamin D analogs” OR “Vitamin D2” OR “25-hydroxyvitamin D” OR “1,25-dihydroxyvitamin D” OR “Vitamin D therapy” |
| Intervention 2 | Exercise OR “Physical activity” OR “Aerobic exercise” OR “Resistance training” OR “Strength training” OR “Endurance training” OR “Combined exercise” OR “Training program” OR “Physical training” OR “Physical fitness” OR “Exercise intervention” OR “Exercise therapy” OR “Aerobic training” OR “Resistance exercise” OR “Walking program” OR “High-intensity interval training” OR HIIT OR “Moderate-intensity continuous training” OR MICT OR “Interval training” OR “Circuit training” OR “Flexibility training” OR Yoga OR Pilates OR “Aquatic exercise” OR “Functional training” OR “Home-based exercise” OR “Supervised exercise” OR “Group exercise” OR “Exercise program” OR “Cardiorespiratory fitness” OR “Muscle strengthening” OR “Weight-bearing exercise” OR “Dance-based exercise” OR Cycling OR Jogging OR Running OR Swimming OR “Sports activity” OR “Physical rehabilitation” OR “Isometric exercise” OR “Isotonic exercise” OR “training” OR “exercise training” OR “athletes” OR “strength exercise” OR “concurrent exercise” OR “concurrent training” or “sports” OR “lifestyle intervention” OR “anaerobic training” OR dancing OR “physical activities” |
| outcome | “Glycemic control” OR “Blood glucose” OR “Fasting blood glucose” OR FBG OR “Fasting plasma glucose” OR FPG OR “HbA1c” OR “Glycosylated hemoglobin” OR “Postprandial glucose” OR “Insulin sensitivity” OR “HOMA-IR” OR “Glucose tolerance” OR “Oral glucose tolerance test” OR OGTT OR Insulin OR Glucose OR "Insulin Resistance" OR "Glycemic Index" OR "hemoglobin A1c" OR "haemoglobin a1c" OR "glycated hemoglobin" OR "Glucose Intolerance" OR "Blood sugar" OR "fasting blood sugar" OR QUICKI OR "Vitamin D" OR "Vitamin D3" OR ergocalciferol OR Cholecalciferol OR calciferol OR "1,25-dihydroxyvitamin D" OR calciol OR "25-hydroxyvitamin D" OR Calcidiol OR calcitriol OR "25(OH)D" OR "1,25(OH)2D" OR "Serum vitamin D" OR "Vitamin D level" OR "Vitamin D status" OR "D3 vitamin" OR "Vitamin D supplementation" OR "Vitamin D deficiency" OR “Vitamin D analogs” OR “Vitamin D2” OR “25-hydroxyvitamin D” OR “1,25-dihydroxyvitamin D” OR “Vitamin D therapy” |
| population | “Type 2 diabetes” OR “Type II diabetes mellitus” OR T2DM OR “Non–insulin-dependent diabetes mellitus” OR NIDDM OR “Adult-onset diabetes” OR “Diabetes mellitus type 2” OR “Insulin resistance” OR "Diabetes Mellitus" OR Diabetes OR "Prediabetic State" OR "Prediabetes" OR Hyperglycemia OR Obesity OR “Obese*” OR Overweight OR “Weight gain” OR “Weight excess” OR “Weight management” OR “Excess body weight” OR “Increased body weight” OR Adiposity OR “Abdominal obesity” OR “Central obesity” OR “Body mass index” OR BMI OR Overfat OR “Weight loss” OR “Waist circumference” OR “Body fat distribution” OR “Body fat percentage” OR “Visceral fat” OR “Truncal obesity” OR “Severe obesity” OR “Morbid obesity” OR “Overweight status” OR "Dyslipidemia*" OR "Hyperlipidemia*" OR "Hypercholesterolemia" OR "Hypertriglyceridemia" OR "Lipid disorder" OR "Metabolic Syndrome" OR "Metabolic Syndrome X" OR "Syndrome X" OR "Insulin resistance syndrome" OR "Hypertension" OR "Blood Pressure" OR "high blood pressure" OR "Cardiovascular Diseases" OR "Coronary Artery Disease" OR "Myocardial Infarction" OR "Stroke" OR "Heart Failure" OR "Atherosclerosis" OR "Heart disease" OR "Ischemic heart disease" OR "Peripheral artery disease" OR "Cerebrovascular Disorders" OR "Polycystic Ovary Syndrome" OR "PCOS" OR "diabetes mellitus, type 1" OR "non-alcoholic fatty liver disease" OR "NAFLD" OR "nonalcoholic fatty liver" OR "non-alcoholic steatohepatitis" OR "NASH" OR "fatty liver" OR "metabolic dysfunction-associated steatotic liver disease" OR "MASLD" OR "metabolic dysfunction-associated steatohepatitis" OR "MASH" OR "diabetic nephropathy" OR "metabolic kidney disease" OR "metabolic nephropathy" |
| Design | Intervention OR "Intervention Study" OR "Intervention Studies" OR "controlled trial*" OR "Controlled Clinical Trial" OR randomized OR randomised OR random* OR randomly OR placebo OR "clinical trial*" OR Trial OR "randomized controlled trial" OR "randomized clinical trial" OR RCT OR blinded OR "double blind" OR "double blinded" OR "Single-Blind" OR trial* OR "clinical trial" OR trials OR "Pragmatic Clinical Trial" OR "Cross-Over Studies" OR "Cross-Over" OR "Cross-Over Study" OR parallel OR "parallel study" OR "parallel trial" OR "Comparative Study" OR "Follow-Up Studies" |
| Exclusions | "rats" OR "mice" OR "swine" OR "mouse" OR "mus" OR "rat" OR "in-vitro" OR "in-vitro" OR "pig" OR "rabbit" OR "rooster" OR "cell" OR "cells" OR "cow" OR "cows" OR "suide" OR "warthogs" OR "broilers" OR "roiler" OR "in-vivo" OR "in-vivo" OR "rats" OR "pigs" OR "rats*" OR "goats" OR "chicken" OR "shrimp" OR "sheep" OR "cats" OR "dogs" OR "crab" OR "monkeys" OR "rabbits" OR "ducks" OR "fowl" OR "fowls" OR "roots" OR "bacteria" OR "camel" OR "Cohort Studies" OR "cohort*" OR "Cross-Sectional Studies" |

**PubMed**

Number of localized studies: 484

|  | **Descriptors** | **Number of studies reached** |
| --- | --- | --- |
| #1 | **"Vitamin D"[MeSH Terms] OR "vitamin d deficiency"[MeSH Terms] OR "Cholecalciferol"[MeSH Terms] OR "Ergocalciferols"[MeSH Terms] OR "Vitamin D"[Title/Abstract] OR "Vitamin D3"[Title/Abstract] OR "ergocalciferol"[Title/Abstract] OR "Cholecalciferol"[Title/Abstract] OR "calciferol"[Title/Abstract] OR "1,25-dihydroxyvitamin D"[Title/Abstract] OR "calciol"[Title/Abstract] OR "25-hydroxyvitamin D"[Title/Abstract] OR "Calcidiol"[Title/Abstract] OR "calcitriol"[Title/Abstract] OR "25 oh d"[Title/Abstract] OR "1 25 oh 2d"[Title/Abstract] OR "Serum vitamin D"[Title/Abstract] OR "Vitamin D level"[Title/Abstract] OR "Vitamin D status"[Title/Abstract] OR "D3 vitamin"[Title/Abstract] OR "Vitamin D supplementation"[Title/Abstract] OR "vitamin d deficiency"[Title/Abstract] OR "Vitamin D analogs"[Title/Abstract] OR "Vitamin D2"[Title/Abstract] OR "25-hydroxyvitamin D"[Title/Abstract] OR "1,25-dihydroxyvitamin D"[Title/Abstract] OR "Vitamin D therapy"[Title/Abstract]** | 124,175 |
| #2 | **"Exercise"[MeSH Terms] OR "Sports"[MeSH Terms] OR "physical fitness"[MeSH Terms] OR "resistance training"[MeSH Terms] OR "exercise therapy"[MeSH Terms] OR "Exercise"[Title/Abstract] OR "Physical activity"[Title/Abstract] OR "Aerobic exercise"[Title/Abstract] OR "resistance training"[Title/Abstract] OR "Strength training"[Title/Abstract] OR "Endurance training"[Title/Abstract] OR "Combined exercise"[Title/Abstract] OR "Training program"[Title/Abstract] OR "Physical training"[Title/Abstract] OR "physical fitness"[Title/Abstract] OR "Exercise intervention"[Title/Abstract] OR "exercise therapy"[Title/Abstract] OR "Aerobic training"[Title/Abstract] OR "Resistance exercise"[Title/Abstract] OR "Walking program"[Title/Abstract] OR "High-intensity interval training"[Title/Abstract] OR "HIIT"[Title/Abstract] OR "Moderate-intensity continuous training"[Title/Abstract] OR "MICT"[Title/Abstract] OR "Interval training"[Title/Abstract] OR "Circuit training"[Title/Abstract] OR "Flexibility training"[Title/Abstract] OR "Yoga"[Title/Abstract] OR "Pilates"[Title/Abstract] OR "Aquatic exercise"[Title/Abstract] OR "Functional training"[Title/Abstract] OR "Home-based exercise"[Title/Abstract] OR "Supervised exercise"[Title/Abstract] OR "Group exercise"[Title/Abstract] OR "Exercise program"[Title/Abstract] OR "Cardiorespiratory fitness"[Title/Abstract] OR "Muscle strengthening"[Title/Abstract] OR "Weight-bearing exercise"[Title/Abstract] OR "Dance-based exercise"[Title/Abstract] OR "Cycling"[Title/Abstract] OR "Jogging"[Title/Abstract] OR "Running"[Title/Abstract] OR "Swimming"[Title/Abstract] OR "Sports activity"[Title/Abstract] OR "Physical rehabilitation"[Title/Abstract] OR "Isometric exercise"[Title/Abstract] OR "Isotonic exercise"[Title/Abstract] OR "training"[Title/Abstract] OR "exercise training"[Title/Abstract] OR "athletes"[Title/Abstract] OR "strength exercise"[Title/Abstract] OR "concurrent exercise"[Title/Abstract] OR "concurrent training"[Title/Abstract] OR "Sports"[Title/Abstract] OR "lifestyle intervention"[Title/Abstract] OR "anaerobic training"[Title/Abstract] OR "dancing"[Title/Abstract] OR "physical activities"[Title/Abstract]** | 1,480,567 |
| #3 | **"blood glucose"[MeSH Terms] OR "glycemic control"[MeSH Terms] OR "Insulin"[MeSH Terms] OR "Glucose"[MeSH Terms] OR "Insulin Resistance"[MeSH Terms] OR "Vitamin D"[MeSH Terms] OR "vitamin d deficiency"[MeSH Terms] OR "Cholecalciferol"[MeSH Terms] OR "Ergocalciferols"[MeSH Terms] OR "glycemic control"[Title/Abstract] OR "blood glucose"[Title/Abstract] OR "Fasting blood glucose"[Title/Abstract] OR "FBG"[Title/Abstract] OR "Fasting plasma glucose"[Title/Abstract] OR "FPG"[Title/Abstract] OR "HbA1c"[Title/Abstract] OR "Glycosylated hemoglobin"[Title/Abstract] OR "Postprandial glucose"[Title/Abstract] OR "Insulin sensitivity"[Title/Abstract] OR "HOMA-IR"[Title/Abstract] OR "Glucose tolerance"[Title/Abstract] OR "Oral glucose tolerance test"[Title/Abstract] OR "OGTT"[Title/Abstract] OR "Insulin"[Title/Abstract] OR "Glucose"[Title/Abstract] OR "Insulin Resistance"[Title/Abstract] OR "Glycemic Index"[Title/Abstract] OR "hemoglobin A1c"[Title/Abstract] OR "haemoglobin a1c"[Title/Abstract] OR "glycated hemoglobin"[Title/Abstract] OR "Glucose Intolerance"[Title/Abstract] OR "Blood sugar"[Title/Abstract] OR "fasting blood sugar"[Title/Abstract] OR "QUICKI"[Title/Abstract] OR "Vitamin D"[Title/Abstract] OR "Vitamin D3"[Title/Abstract] OR "ergocalciferol"[Title/Abstract] OR "Cholecalciferol"[Title/Abstract] OR "calciferol"[Title/Abstract] OR "1,25-dihydroxyvitamin D"[Title/Abstract] OR "calciol"[Title/Abstract] OR "25-hydroxyvitamin D"[Title/Abstract] OR "Calcidiol"[Title/Abstract] OR "calcitriol"[Title/Abstract] OR "25 oh d"[Title/Abstract] OR "1 25 oh 2d"[Title/Abstract] OR "Serum vitamin D"[Title/Abstract] OR "Vitamin D level"[Title/Abstract] OR "Vitamin D status"[Title/Abstract] OR "D3 vitamin"[Title/Abstract] OR "Vitamin D supplementation"[Title/Abstract] OR "vitamin d deficiency"[Title/Abstract] OR "Vitamin D analogs"[Title/Abstract] OR "Vitamin D2"[Title/Abstract] OR "25-hydroxyvitamin D"[Title/Abstract] OR "1,25-dihydroxyvitamin D"[Title/Abstract] OR "Vitamin D therapy"[Title/Abstract]** | 1,157,264 |
| #4 | **"Diabetes Mellitus"[MeSH Terms] OR "diabetes mellitus, type 2"[MeSH Terms] OR "Prediabetic State"[MeSH Terms] OR "Hyperlipidemias"[MeSH Terms] OR "Hypercholesterolemia"[MeSH Terms] OR "Hypertriglyceridemia"[MeSH Terms] OR "Obesity"[MeSH Terms] OR "Overweight"[MeSH Terms] OR "Metabolic Syndrome"[MeSH Terms] OR "Hypertension"[MeSH Terms] OR "Blood Pressure"[MeSH Terms] OR "Cardiovascular Diseases"[MeSH Terms] OR "Coronary Artery Disease"[MeSH Terms] OR "Myocardial Infarction"[MeSH Terms] OR "Stroke"[MeSH Terms] OR "Heart Failure"[MeSH Terms] OR "Atherosclerosis"[MeSH Terms] OR "diabetes mellitus, type 1"[MeSH Terms] OR "Type 2 diabetes"[Title/Abstract] OR "Type II diabetes mellitus"[Title/Abstract] OR "T2DM"[Title/Abstract] OR "Non-insulin-dependent diabetes mellitus"[Title/Abstract] OR "NIDDM"[Title/Abstract] OR "Adult-onset diabetes"[Title/Abstract] OR "Diabetes mellitus type 2"[Title/Abstract] OR "Insulin resistance"[Title/Abstract] OR "Diabetes Mellitus"[Title/Abstract] OR "Diabetes"[Title/Abstract] OR "Prediabetic State"[Title/Abstract] OR "Prediabetes"[Title/Abstract] OR "Hyperglycemia"[Title/Abstract] OR "Obesity"[Title/Abstract] OR "obese*"[Title/Abstract] OR "Overweight"[Title/Abstract] OR "Weight gain"[Title/Abstract] OR "Weight excess"[Title/Abstract] OR "Weight management"[Title/Abstract] OR "Excess body weight"[Title/Abstract] OR "Increased body weight"[Title/Abstract] OR "Adiposity"[Title/Abstract] OR "Abdominal obesity"[Title/Abstract] OR "Central obesity"[Title/Abstract] OR "Body mass index"[Title/Abstract] OR "BMI"[Title/Abstract] OR "Overfat"[Title/Abstract] OR "Weight loss"[Title/Abstract] OR "Waist circumference"[Title/Abstract] OR "Body fat distribution"[Title/Abstract] OR "Body fat percentage"[Title/Abstract] OR "Visceral fat"[Title/Abstract] OR "Truncal obesity"[Title/Abstract] OR "Severe obesity"[Title/Abstract] OR "Morbid obesity"[Title/Abstract] OR "Overweight status"[Title/Abstract] OR "dyslipidemia*"[Title/Abstract] OR "hyperlipidemia*"[Title/Abstract] OR "Hypercholesterolemia"[Title/Abstract] OR "Hypertriglyceridemia"[Title/Abstract] OR "Lipid disorder"[Title/Abstract] OR "Metabolic Syndrome"[Title/Abstract] OR "Metabolic Syndrome X"[Title/Abstract] OR "Syndrome X"[Title/Abstract] OR "Insulin resistance syndrome"[Title/Abstract] OR "Hypertension"[Title/Abstract] OR "Blood Pressure"[Title/Abstract] OR "high blood pressure"[Title/Abstract] OR "Cardiovascular Diseases"[Title/Abstract] OR "Coronary Artery Disease"[Title/Abstract] OR "Myocardial Infarction"[Title/Abstract] OR "Stroke"[Title/Abstract] OR "Heart Failure"[Title/Abstract] OR "Atherosclerosis"[Title/Abstract] OR "Heart disease"[Title/Abstract] OR "Ischemic heart disease"[Title/Abstract] OR "Peripheral artery disease"[Title/Abstract] OR "Cerebrovascular Disorders"[Title/Abstract] OR "Polycystic Ovary Syndrome"[Title/Abstract] OR "PCOS"[Title/Abstract] OR "diabetes mellitus type 1"[Title/Abstract] OR "non-alcoholic fatty liver disease"[Title/Abstract] OR "NAFLD"[Title/Abstract] OR "nonalcoholic fatty liver"[Title/Abstract] OR "non-alcoholic steatohepatitis"[Title/Abstract] OR "NASH"[Title/Abstract] OR "fatty liver"[Title/Abstract] OR "metabolic dysfunction-associated steatotic liver disease"[Title/Abstract] OR "MASLD"[Title/Abstract] OR "metabolic dysfunction-associated steatohepatitis"[Title/Abstract] OR "MASH"[Title/Abstract] OR "diabetic nephropathy"[Title/Abstract] OR "metabolic kidney disease"[Title/Abstract] OR "metabolic nephropathy"[Title/Abstract]** | 4,891,502 |
| #5 | **"Randomized Controlled Trials as Topic"[MeSH Terms] OR "Randomized Controlled Trial"[Publication Type] OR "Controlled Clinical Trial"[Publication Type] OR "Clinical Trial"[Publication Type] OR "Clinical Trials as Topic"[MeSH Terms] OR "Comparative Study"[Publication Type] OR "Intervention"[Title/Abstract] OR "Intervention Study"[Title/Abstract] OR "Intervention Studies"[Title/Abstract] OR "controlled trial*"[Title/Abstract] OR "Controlled Clinical Trial"[Title/Abstract] OR "randomized"[Title/Abstract] OR "randomised"[Title/Abstract] OR "random*"[Title/Abstract] OR "randomly"[Title/Abstract] OR "placebo"[Title/Abstract] OR "clinical trial*"[Title/Abstract] OR "Trial"[Title/Abstract] OR "Randomized Controlled Trial"[Title/Abstract] OR "randomized clinical trial"[Title/Abstract] OR "RCT"[Title/Abstract] OR "blinded"[Title/Abstract] OR "double blind"[Title/Abstract] OR "double blinded"[Title/Abstract] OR "Single-Blind"[Title/Abstract] OR "trial*"[Title/Abstract] OR "Clinical Trial"[Title/Abstract] OR "trials"[Title/Abstract] OR "Pragmatic Clinical Trial"[Title/Abstract] OR "Cross-Over Studies"[Title/Abstract] OR "Cross-Over"[Title/Abstract] OR "Cross-Over Study"[Title/Abstract] OR "parallel"[Title/Abstract] OR "parallel study"[Title/Abstract] OR "parallel trial"[Title/Abstract] OR "Comparative Study"[Title/Abstract] OR "Follow-Up Studies"[Title/Abstract]** | 5,602,272 |
| #6 | **"Rats"[MeSH Terms] OR "Mice"[MeSH Terms] OR "In Vitro Techniques"[MeSH Terms] OR "Rabbits"[MeSH Terms] OR "Swine"[MeSH Terms] OR "observational studies, veterinary as topic"[MeSH Terms] OR "Cohort Studies"[MeSH Terms] OR "Cross-Sectional Studies"[MeSH Terms] OR "Rats"[Title/Abstract] OR "Mice"[Title/Abstract] OR "Swine"[Title/Abstract] OR "mouse"[Title/Abstract] OR "mus"[Title/Abstract] OR "rat"[Title/Abstract] OR "in-vitro"[Title/Abstract] OR "in-vitro"[Title/Abstract] OR "pig"[Title/Abstract] OR "rabbit"[Title/Abstract] OR "rooster"[Title/Abstract] OR "cell"[Title/Abstract] OR "cells"[Title/Abstract] OR "cow"[Title/Abstract] OR "cows"[Title/Abstract] OR "suide"[Title/Abstract] OR "warthogs"[Title/Abstract] OR "broilers"[Title/Abstract] OR "roiler"[Title/Abstract] OR "in-vivo"[Title/Abstract] OR "in-vivo"[Title/Abstract] OR "Rats"[Title/Abstract] OR "pigs"[Title/Abstract] OR "rats*"[Title/Abstract] OR "goats"[Title/Abstract] OR "chicken"[Title/Abstract] OR "shrimp"[Title/Abstract] OR "sheep"[Title/Abstract] OR "cats"[Title/Abstract] OR "dogs"[Title/Abstract] OR "crab"[Title/Abstract] OR "monkeys"[Title/Abstract] OR "Rabbits"[Title/Abstract] OR "ducks"[Title/Abstract] OR "fowl"[Title/Abstract] OR "fowls"[Title/Abstract] OR "roots"[Title/Abstract] OR "bacteria"[Title/Abstract] OR "camel"[Title/Abstract] OR "Cohort Studies"[Title/Abstract] OR "cohort*"[Title/Abstract] OR "Cross-Sectional Studies"[Title/Abstract]** | 13,736,558 |
| #7 | #1 AND #2 AND #3 AND #4 AND #5 NOT #6 | 484 |

**Web of Science**

Number of localized studies: 1,120

|  | **Descriptors** | **Number of studies reached** |
| --- | --- | --- |
| #1 | **TS=("Vitamin D" OR "Vitamin D3" OR ergocalciferol OR Cholecalciferol OR calciferol OR "1,25-dihydroxyvitamin D" OR calciol OR "25-hydroxyvitamin D" OR Calcidiol OR calcitriol OR "25(OH)D" OR "1,25(OH)2D" OR "Serum vitamin D" OR "Vitamin D level" OR "Vitamin D status" OR "D3 vitamin" OR "Vitamin D supplementation" OR "Vitamin D deficiency" OR "Vitamin D analogs" OR “Vitamin D2” OR “25-hydroxyvitamin D” OR “1,25-dihydroxyvitamin D” OR "Vitamin D therapy")** | 128,514 |
| #2 | **TS=(Exercise OR “Physical activity” OR “Aerobic exercise” OR “Resistance training” OR “Strength training” OR “Endurance training” OR “Combined exercise” OR “Training program” OR “Physical training” OR “Physical fitness” OR “Exercise intervention” OR “Exercise therapy” OR “Aerobic training” OR “Resistance exercise” OR “Walking program” OR “High-intensity interval training” OR HIIT OR “Moderate-intensity continuous training” OR MICT OR “Interval training” OR “Circuit training” OR “Flexibility training” OR Yoga OR Pilates OR “Aquatic exercise” OR “Functional training” OR “Home-based exercise” OR “Supervised exercise” OR “Group exercise” OR “Exercise program” OR “Cardiorespiratory fitness” OR “Muscle strengthening” OR “Weight-bearing exercise” OR “Dance-based exercise” OR Cycling OR Jogging OR Running OR Swimming OR “Sports activity” OR “Physical rehabilitation” OR “Isometric exercise” OR “Isotonic exercise” OR “training” OR “exercise training” OR “athletes” OR “strength exercise” OR “concurrent exercise” OR “concurrent training” or “sports” OR “lifestyle intervention” OR “anaerobic training” OR dancing OR “physical activities”)** | 4361012 |
| #3 | **TS=(“Glycemic control” OR “Blood glucose” OR “Fasting blood glucose” OR FBG OR “Fasting plasma glucose” OR FPG OR “HbA1c” OR “Glycosylated hemoglobin” OR “Postprandial glucose” OR “Insulin sensitivity” OR “HOMA-IR” OR “Glucose tolerance” OR “Oral glucose tolerance test” OR OGTT OR Insulin OR Glucose OR "Insulin Resistance" OR "Glycemic Index" OR "hemoglobin A1c" OR "haemoglobin a1c" OR "glycated hemoglobin" OR "Glucose Intolerance" OR "Blood sugar" OR "fasting blood sugar" OR QUICKI OR "Vitamin D" OR "Vitamin D3" OR ergocalciferol OR Cholecalciferol OR calciferol OR "1,25-dihydroxyvitamin D" OR calciol OR "25-hydroxyvitamin D" OR Calcidiol OR calcitriol OR "25(OH)D" OR "1,25(OH)2D" OR "Serum vitamin D" OR "Vitamin D level" OR "Vitamin D status" OR "D3 vitamin" OR "Vitamin D supplementation" OR "Vitamin D deficiency" OR “Vitamin D analogs” OR “Vitamin D2” OR “25-hydroxyvitamin D” OR “1,25-dihydroxyvitamin D” OR “Vitamin D therapy”)** | 996,066 |
| #4 | **TS=(“Type 2 diabetes” OR “Type II diabetes mellitus” OR T2DM OR “Non–insulin-dependent diabetes mellitus” OR NIDDM OR “Adult-onset diabetes” OR “Diabetes mellitus type 2” OR “Insulin resistance” OR "Diabetes Mellitus" OR Diabetes OR "Prediabetic State" OR "Prediabetes" OR Hyperglycemia OR Obesity OR “Obese*” OR Overweight OR “Weight gain” OR “Weight excess” OR “Weight management” OR “Excess body weight” OR “Increased body weight” OR Adiposity OR “Abdominal obesity” OR “Central obesity” OR “Body mass index” OR BMI OR Overfat OR “Weight loss” OR “Waist circumference” OR “Body fat distribution” OR “Body fat percentage” OR “Visceral fat” OR “Truncal obesity” OR “Severe obesity” OR “Morbid obesity” OR “Overweight status” OR "Dyslipidemia*" OR "Hyperlipidemia*" OR "Hypercholesterolemia" OR "Hypertriglyceridemia" OR "Lipid disorder" OR "Metabolic Syndrome" OR "Metabolic Syndrome X" OR "Syndrome X" OR "Insulin resistance syndrome" OR "Hypertension" OR "Blood Pressure" OR "high blood pressure" OR "Cardiovascular Diseases" OR "Coronary Artery Disease" OR "Myocardial Infarction" OR "Stroke" OR "Heart Failure" OR "Atherosclerosis" OR "Heart disease" OR "Ischemic heart disease" OR "Peripheral artery disease" OR "Cerebrovascular Disorders" OR "Polycystic Ovary Syndrome" OR "PCOS" OR "diabetes mellitus, type 1" OR "non-alcoholic fatty liver disease" OR "NAFLD" OR "nonalcoholic fatty liver" OR "non-alcoholic steatohepatitis" OR "NASH" OR "fatty liver" OR "metabolic dysfunction-associated steatotic liver disease" OR "MASLD" OR "metabolic dysfunction-associated steatohepatitis" OR "MASH" OR "diabetic nephropathy" OR "metabolic kidney disease" OR "metabolic nephropathy")** | 3,686,424 |
| #5 | **TS=(Intervention OR "Intervention Study" OR "Intervention Studies" OR "controlled trial*" OR "Controlled Clinical Trial" OR randomized OR randomised OR random* OR randomly OR placebo OR "clinical trial*" OR Trial OR "randomized controlled trial" OR "randomized clinical trial" OR RCT OR blinded OR "double blind" OR "double blinded" OR "Single-Blind" OR trial* OR "clinical trial" OR trials OR "Pragmatic Clinical Trial" OR "Cross-Over Studies" OR "Cross-Over" OR "Cross-Over Study" OR parallel OR "parallel study" OR "parallel trial" OR "Comparative Study" OR "Follow-Up Studies")** | 6,341,327 |
| #6 | **TS=("rats" OR "mice" OR "swine" OR "mouse" OR "mus" OR "rat" OR "in-vitro" OR "in-vitro" OR "pig" OR "rabbit" OR "rooster" OR "cell" OR "cells" OR "cow" OR "cows" OR "suide" OR "warthogs" OR "broilers" OR "roiler" OR "in-vivo" OR "in-vivo" OR "rats" OR "pigs" OR "rats*" OR "goats" OR "chicken" OR "shrimp" OR "sheep" OR "cats" OR "dogs" OR "crab" OR "monkeys" OR "rabbits" OR "ducks" OR "fowl" OR "fowls" OR "roots" OR "bacteria" OR "camel" OR "Cohort Studies" OR "cohort*" OR "Cross-Sectional Studies")** | 12,996,172 |
| #7 | #1 AND #2 AND #3 AND #4 AND #5 NOT #6 | 1,120 |

**Scopus**

Number of localized studies: 1,922

|  | **Descriptors** | **Number of studies reached** |
| --- | --- | --- |
| #1 | TITLE-ABS-KEY ( "Vitamin D" OR "Vitamin D3" OR ergocalciferol OR Cholecalciferol OR calciferol OR "1,25-dihydroxyvitamin D" OR calciol OR "25-hydroxyvitamin D" OR Calcidiol OR calcitriol OR "25(OH)D" OR "1,25(OH)2D" OR "Serum vitamin D" OR "Vitamin D level" OR "Vitamin D status" OR "D3 vitamin" OR "Vitamin D supplementation" OR "Vitamin D deficiency" OR "Vitamin D analogs" OR "Vitamin D2" OR "25-hydroxyvitamin D" OR "1,25-dihydroxyvitamin D" OR "Vitamin D therapy" ) | 189,681 |
| #2 | TITLE-ABS-KEY ( Exercise OR "Physical activity" OR "Aerobic exercise" OR "Resistance training" OR "Strength training" OR "Endurance training" OR "Combined exercise" OR "Training program" OR "Physical training" OR "Physical fitness" OR "Exercise intervention" OR "Exercise therapy" OR "Aerobic training" OR "Resistance exercise" OR "Walking program" OR "High-intensity interval training" OR HIIT OR "Moderate-intensity continuous training" OR MICT OR "Interval training" OR "Circuit training" OR "Flexibility training" OR Yoga OR Pilates OR "Aquatic exercise" OR "Functional training" OR "Home-based exercise" OR "Supervised exercise" OR "Group exercise" OR "Exercise program" OR "Cardiorespiratory fitness" OR "Muscle strengthening" OR "Weight-bearing exercise" OR "Dance-based exercise" OR Cycling OR Jogging OR Running OR Swimming OR "Sports activity" OR "Physical rehabilitation" OR "Isometric exercise" OR "Isotonic exercise" OR "training" OR "exercise training" OR "athletes" OR "strength exercise" OR "concurrent exercise" OR "concurrent training" OR "sports" OR "lifestyle intervention" OR "anaerobic training" OR dancing OR "physical activities" ) | 3,954,755 |
| #3 | TITLE-ABS-KEY ( "Glycemic control" OR "Blood glucose" OR "Fasting blood glucose" OR FBG OR "Fasting plasma glucose" OR FPG OR "HbA1c" OR "Glycosylated hemoglobin" OR "Postprandial glucose" OR "Insulin sensitivity" OR "HOMA-IR" OR "Glucose tolerance" OR "Oral glucose tolerance test" OR OGTT OR Insulin OR Glucose OR "Insulin Resistance" OR "Glycemic Index" OR "hemoglobin A1c" OR "haemoglobin a1c" OR "glycated hemoglobin" OR "Glucose Intolerance" OR "Blood sugar" OR "fasting blood sugar" OR QUICKI OR "Vitamin D" OR "Vitamin D3" OR ergocalciferol OR Cholecalciferol OR calciferol OR "1,25-dihydroxyvitamin D" OR calciol OR "25-hydroxyvitamin D" OR Calcidiol OR calcitriol OR "25(OH)D" OR "1,25(OH)2D" OR "Serum vitamin D" OR "Vitamin D level" OR "Vitamin D status" OR "D3 vitamin" OR "Vitamin D supplementation" OR "Vitamin D deficiency" OR "Vitamin D analogs" OR "Vitamin D2" OR "25-hydroxyvitamin D" OR "1,25-dihydroxyvitamin D" OR "Vitamin D therapy" ) | 1,965,099 |
| #4 | TITLE-ABS-KEY ( "Type 2 diabetes" OR "Type II diabetes mellitus" OR T2DM OR "Non--insulin-dependent diabetes mellitus" OR NIDDM OR "Adult-onset diabetes" OR "Diabetes mellitus type 2" OR "Insulin resistance" OR "Diabetes Mellitus" OR Diabetes OR "Prediabetic State" OR "Prediabetes" OR Hyperglycemia OR Obesity OR "Obese*" OR Overweight OR "Weight gain" OR "Weight excess" OR "Weight management" OR "Excess body weight" OR "Increased body weight" OR Adiposity OR "Abdominal obesity" OR "Central obesity" OR "Body mass index" OR BMI OR Overfat OR "Weight loss" OR "Waist circumference" OR "Body fat distribution" OR "Body fat percentage" OR "Visceral fat" OR "Truncal obesity" OR "Severe obesity" OR "Morbid obesity" OR "Overweight status" OR "Dyslipidemia*" OR "Hyperlipidemia*" OR "Hypercholesterolemia" OR "Hypertriglyceridemia" OR "Lipid disorder" OR "Metabolic Syndrome" OR "Metabolic Syndrome X" OR "Syndrome X" OR "Insulin resistance syndrome" OR "Hypertension" OR "Blood Pressure" OR "high blood pressure" OR "Cardiovascular Diseases" OR "Coronary Artery Disease" OR "Myocardial Infarction" OR "Stroke" OR "Heart Failure" OR "Atherosclerosis" OR "Heart disease" OR "Ischemic heart disease" OR "Peripheral artery disease" OR "Cerebrovascular Disorders" OR "Polycystic Ovary Syndrome" OR "PCOS" OR "diabetes mellitus, type 1" OR "non-alcoholic fatty liver disease" OR "NAFLD" OR "nonalcoholic fatty liver" OR "non-alcoholic steatohepatitis" OR "NASH" OR "fatty liver" OR "metabolic dysfunction-associated steatotic liver disease" OR "MASLD" OR "metabolic dysfunction-associated steatohepatitis" OR "MASH" OR "diabetic nephropathy" OR "metabolic kidney disease" OR "metabolic nephropathy" ) | 5,328,508 |
| #5 | TITLE-ABS-KEY ( Intervention OR "Intervention Study" OR "Intervention Studies" OR "controlled trial*" OR "Controlled Clinical Trial" OR randomized OR randomised OR random* OR randomly OR placebo OR "clinical trial*" OR Trial OR "randomized controlled trial" OR "randomized clinical trial" OR RCT OR blinded OR "double blind" OR "double blinded" OR "Single-Blind" OR trial* OR "clinical trial" OR trials OR "Pragmatic Clinical Trial" OR "Cross-Over Studies" OR "Cross-Over" OR "Cross-Over Study" OR parallel OR "parallel study" OR "parallel trial" OR "Comparative Study" OR "Follow-Up Studies" ) | 10,705,027 |
| #6 | TITLE-ABS-KEY ( "rats" OR "mice" OR "swine" OR "mouse" OR "mus" OR "rat" OR "in-vitro" OR "in-vitro" OR "pig" OR "rabbit" OR "rooster" OR "cell" OR "cells" OR "cow" OR "cows" OR "suide" OR "warthogs" OR "broilers" OR "roiler" OR "in-vivo" OR "in-vivo" OR "rats" OR "pigs" OR "rats*" OR "goats" OR "chicken" OR "shrimp" OR "sheep" OR "cats" OR "dogs" OR "crab" OR "monkeys" OR "rabbits" OR "ducks" OR "fowl" OR "fowls" OR "roots" OR "bacteria" OR "camel" OR "Cohort Studies" OR "cohort*" OR "Cross-Sectional Studies" ) | 19,860,675 |
| #6 | #1 AND #2 AND #3 AND #4 AND #5 AND NOT #6 | 1,922 |

**Supplementary Table 2.** Meta-regression between changes in the study parameters and administered dose of participants.

| Model | Dose | | |
| --- | --- | --- | --- |
| slope | 95%CI | P value |
| FBS (fast blood glucose) | -0.0006 | -0.0014, 0.0002 | 0.1184 |
| Serum vitamin D | -0.0007 | -0.0024, 0.0010 | 0.4126 |

|  | Corrected effect size | | Begg's rank correlation test | | | Egger's linear regression test | | | | | Fail-safe N test |
| --- | --- | --- | --- | --- | --- | --- | --- | --- | --- | --- | --- |
| WMD | 95% CI | Kendall's Tau | z-value | p-value | Intercept | 95% CI | t | df | p-value | N |
| FBG | -16.58 | -20.69, -12.48 | -0.083 | 0.312 | 0.754 | 2.012 | -1.76, 5.78 | 1.26 | 7 | 0.24 | 3449 |
| Serum vitamin D | 14.39 | 10.39, 18.38 | 0.00 | 0.00 | 1.00 | 4.10 | -5.77, 13.98 | 0.91 | 11 | 0.37 | 8305 |

**Supplementary Table 3.** Assessment of publication bias for combined exercise and vitamin D supplementation on glycemic outcomes and serum vitamin D

**Abbreviations:** FBS, fast blood glucose
